# Supplementary material for: Oxidative Stress-Mediated Repression of Virulence Gene Transcription and Biofilm Formation as Antibacterial Action of Cinnamomum burmannii Essential Oil on Staphylococcus aureus
Source: MDPI journal article supplement (doi:10.3390/ijms25053078), 2024-03-06
Supplement: s1 [file s1]

**Table S1.** Primer sequences for quantitative real-time-PCR (qRT-PCR) used in this study

| Gene        | Forward primer sequence        | Reverse primer sequence         |
|-------------|--------------------------------|---------------------------------|
| <i>sigB</i> | 5'-AAGTGATTCGTAAGGACGTCT-3'    | 5'-TCGATAACTATAACCAAAGCCT-3'    |
| <i>agrA</i> | 5'-TGATAATCCTTATGAGGTGCTT-3'   | 5'-CACTGTGACTCGTAACGAAAA-3'     |
| <i>sarA</i> | 5'-TCCCTTCAAAACCAAACGAA-3'     | 5'-AATTCAGGACATGCACCACA-3'      |
| <i>icaA</i> | 5'-GGAAGTTCTGATAATACTGCTG-3'   | 5'-GATGCTTGTTTGATTCCCTC-3'      |
| <i>cidA</i> | 5'-AGCGTAATTTGGAAGCAACATCCA-3' | 5'-CCCTTAGCCGGCAGTATTGTTGGTC-3' |
| <i>rsbU</i> | 5'-AGCGTTTGAGGAAATTGGTGT-3'    | 5'-CCTCTACATCTCGTGCCTCTG-3'     |
| 16S rRNA    | 5'-GGGACCCGCACAAGCGGTGG-3'     | 5'-GGGTTGCGCTCGTTGCGGGA-3'      |

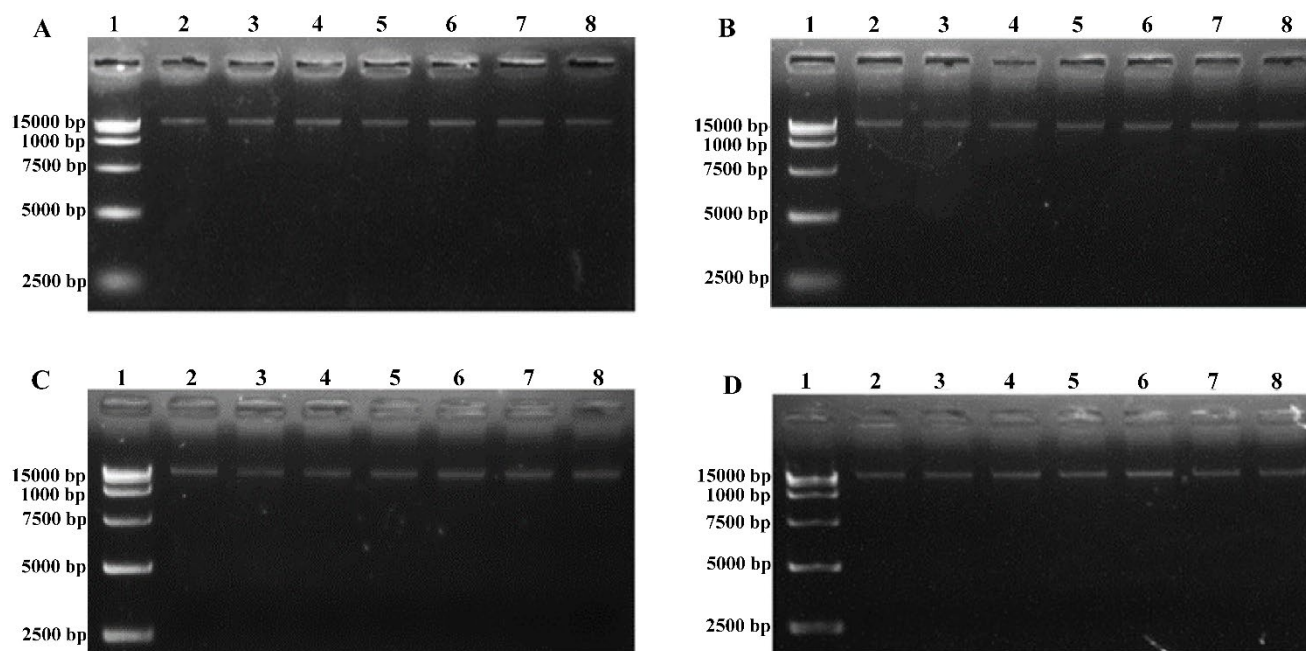

**Figure S1.** Effect of CBLEO on genome DNA of *S. aureus* cells by gel electrophoresis assay. **(A)** After 0.5 h incubation with different levels of CBLEO; **(B)** After 1 h incubation with different levels of CBLEO; **(C)** After 3 h incubation with different levels of CBLEO; **(D)** After 5 h incubation with different levels of CBLEO. Lane 1 signified DNA Marker; Lane 2 signified genome DNA of *S. aureus* treated by PBS (as the control); Lanes 3-8 signified genome DNA of *S. aureus* treated with 1/2×MIC, 1×MIC, 2×MIC, 4×MIC, 8×MIC and 16×MIC of CBLEO, respectively.
